# Supplementary material for: Isolation of Bioactive Compounds from Calicotome villosa Stems
Source: MDPI journal article supplement (doi:10.3390/molecules23040851), 2018-04-08
Supplement: s1 [file s1]

## Supplementary data

# Isolation of Bioactive compounds from *Calicotome villosa* Stems

Josiane Alhage <sup>1,2</sup>, Hoda Elbitar <sup>1,\*</sup>, Samir Taha <sup>1,3</sup>, Jean-Paul Guegan <sup>2</sup>, Zeina Dassouki <sup>1</sup>, Thomas Vives <sup>2</sup> and Thierry Benvegnu <sup>2,\*</sup>

<sup>1</sup> AZM Centre for Research in Biotechnology and Its Applications, Laboratory of Applied Biotechnology for Biomolecules, Biotherapy and Bioprocess, Lebanese University, El Mitein Street, Tripoli, Lebanon; josiane.alhage@ensc-rennes.fr (J.A.); samirtaha@ul.edu.lb (S.T.); zeina\_dassouki@hotmail.com (Z.D.)

<sup>2</sup> ENSCR, CNRS, ISCR (Institut des Sciences Chimiques de Rennes)–UMR 6226, Univ Rennes, 35000 Rennes, France; jean-paul.guegan@ensc-rennes.fr (J.-P.G.); thomas.vives@ensc-rennes.fr (T.V.)

<sup>3</sup> Faculty of Public Health, Rafic Hariri Campus, Lebanese University, Hadath, Beyrouth, Lebanon

\* Correspondence: elbitarhoda@yahoo.fr (H.E.); thierry.benvegnu@ensc-rennes.fr (T.B.); Tel.: +961-3-522-303 (H.E.); +33-223-238-060 (T.B.);

## Contents

### Supplementary Figures

**Figure S1:**  $^1\text{H}$ -NMR spectrum of compound **1** in  $\text{CDCl}_3$

**Figure S2:**  $^{13}\text{C}$ -Jmod - NMR spectrum of compound **1** in  $\text{CDCl}_3$

**Figure S3:**  $^1\text{H}$ - $^1\text{H}$  COSY spectrum of compound **1** in  $\text{CDCl}_3$

**Figure S4:**  $^1\text{H}$ - $^{13}\text{C}$  HSQC spectrum of compound **1** in  $\text{CDCl}_3$

**Figure S5:**  $^1\text{H}$ -NMR spectrum of compound **2** in  $\text{CDCl}_3$

**Figure S6:**  $^{13}\text{C}$ -Jmod - NMR spectrum of compound **2** in  $\text{CDCl}_3$

**Figure S7:**  $^1\text{H}$ -NMR spectrum of compound **3** in DMSO

**Figure S8:**  $^{13}\text{C}$ -Jmod - NMR spectrum of compound **3** in DMSO

**Figure S9:**  $^1\text{H}$ - $^{13}\text{C}$  HMBC spectrum of compound **3** in DMSO

**Figure S10:**  $^1\text{H}$ -NMR spectrum of compound **4** in  $\text{CD}_3\text{OD}$

**Figure S11:**  $^1\text{H}$ - $^1\text{H}$  COSY spectrum of compound **4** in  $\text{CD}_3\text{OD}$

**Figure S12:**  $^1\text{H}$ - $^{13}\text{C}$  HSQC spectrum of compound **4** in  $\text{CD}_3\text{OD}$

**Figure S13:**  $^1\text{H}$ - $^1\text{H}$  COSY spectrum of compound **5** in  $\text{CD}_3\text{OD}$

**Figure S14:**  $^{13}\text{C}$ -Jmod - NMR spectrum of compound **5** in  $\text{CD}_3\text{OD}$

**Figure S15:**  $^1\text{H}$ - $^{13}\text{C}$  HSQC spectrum of compound **5** in  $\text{CD}_3\text{OD}$

**Figure S16:**  $^1\text{H}$ - $^{13}\text{C}$  HMBC spectrum of compound **5** in  $\text{CD}_3\text{OD}$

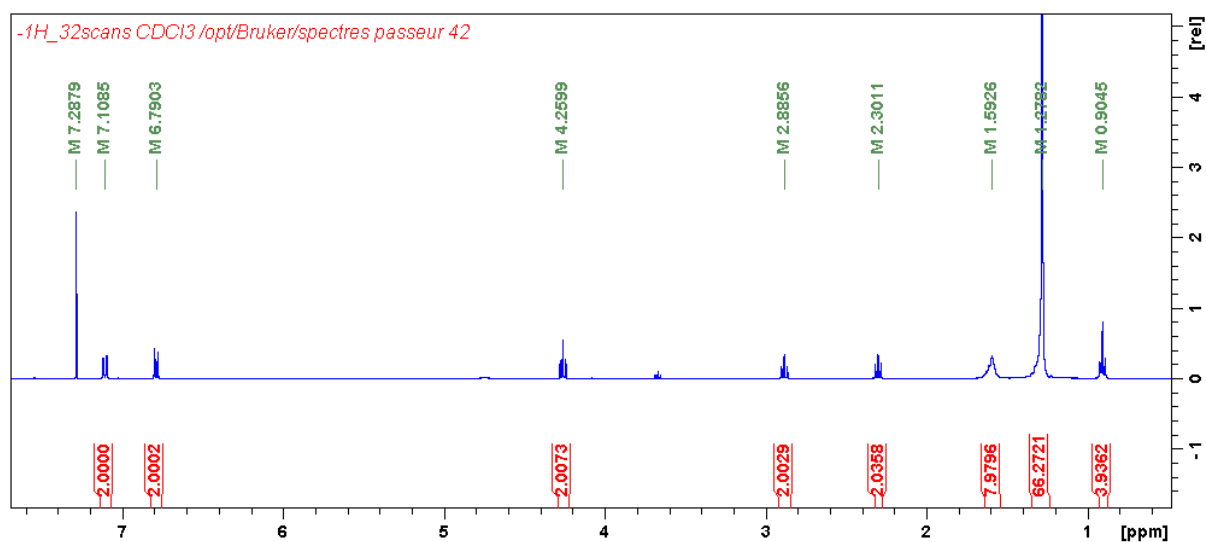

**Figure S1:**  $^1\text{H}$ -NMR spectrum of compound **1** in  $\text{CDCl}_3$ , 25°C at 400.13 MHz

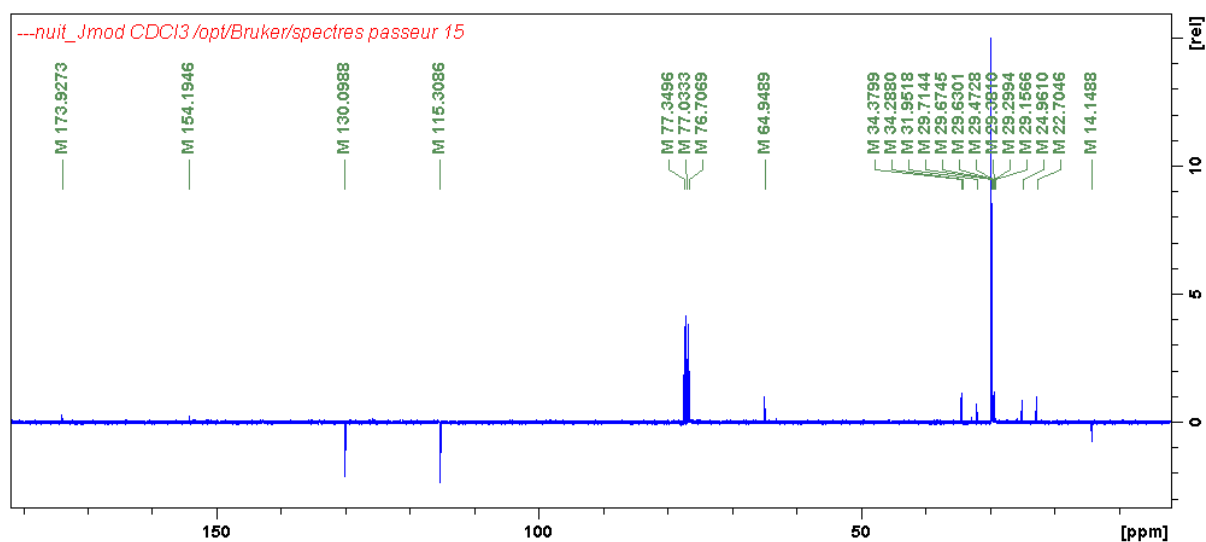

**Figure S2:**  $^{13}\text{C}$ -Jmod - NMR spectrum of compound **1** in  $\text{CDCl}_3$ , 25°C at 100.13 MHz

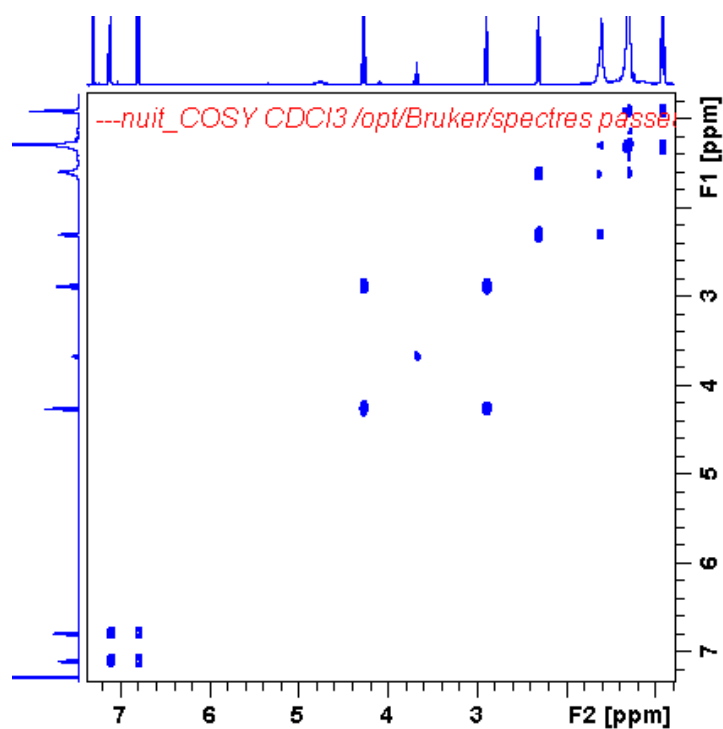

**Figure S3:**  $^1\text{H}$ - $^1\text{H}$  COSY spectrum of compound **1** in  $\text{CDCl}_3$ , 25°C at 400.13 MHz

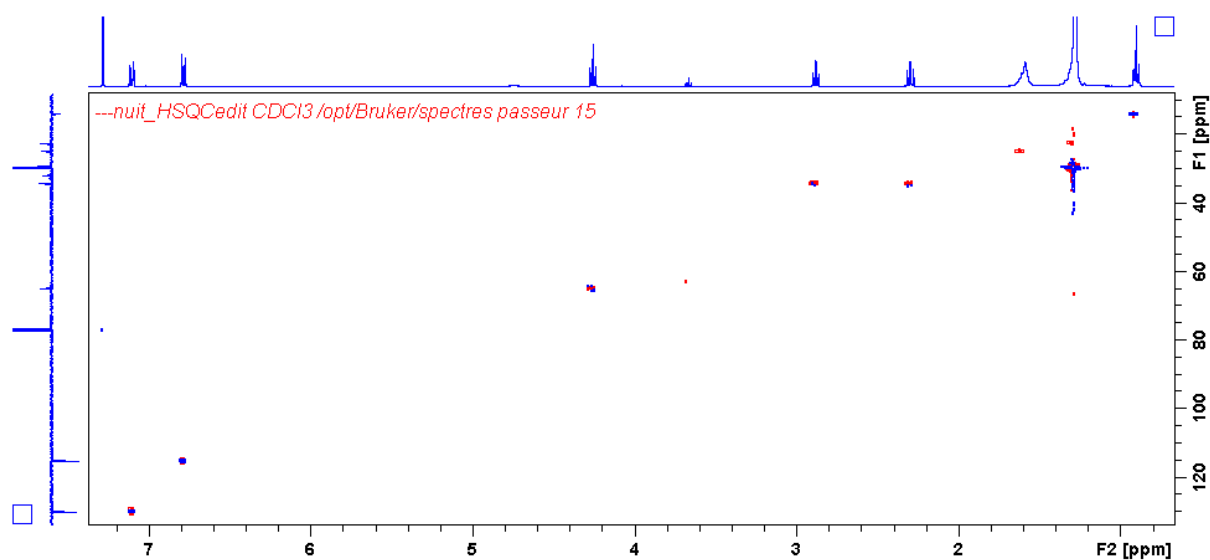

**Figure S4:**  $^1\text{H}$ - $^{13}\text{C}$  HSQC spectrum of compound **1** in  $\text{CDCl}_3$ , 25°C at 400.13 MHz for  $^1\text{H}$

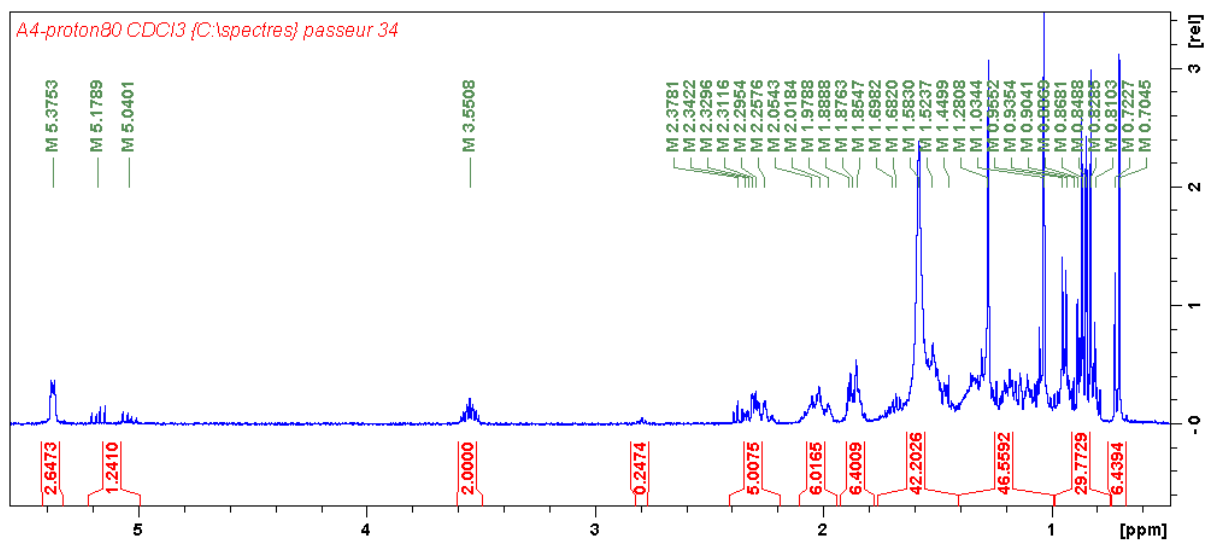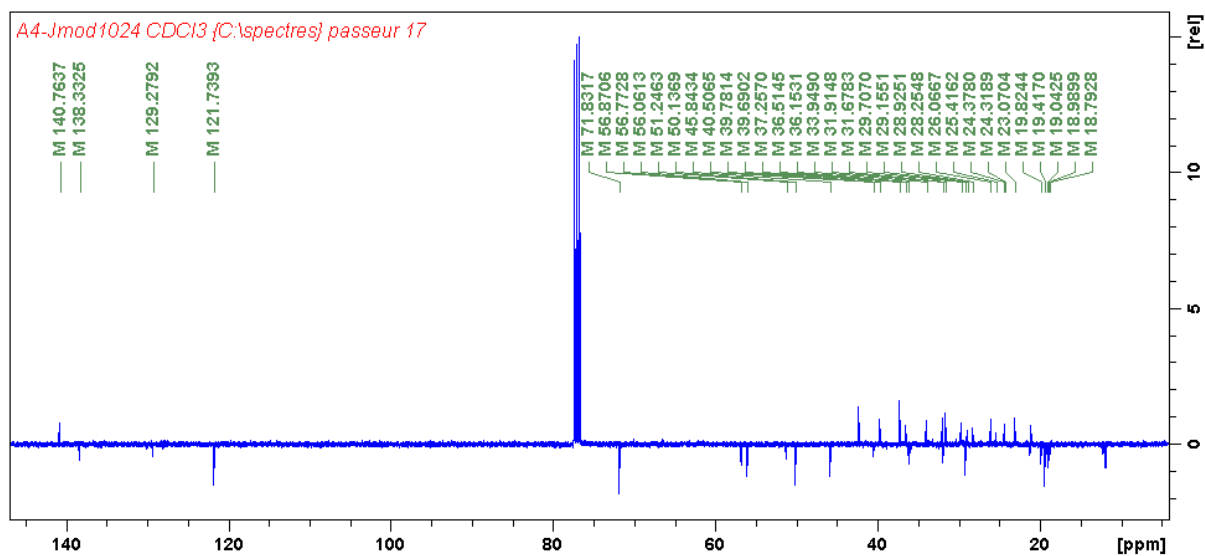

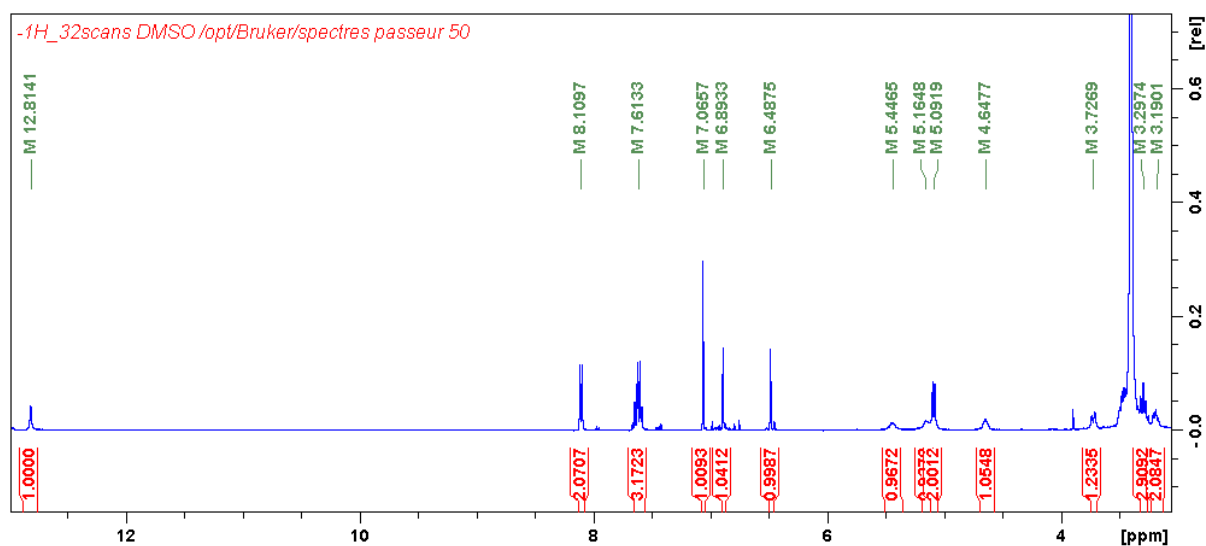

**Figure S7:**  $^1\text{H}$ -NMR spectrum of compound **3** in DMSO, 25°C at 400.13 MHz

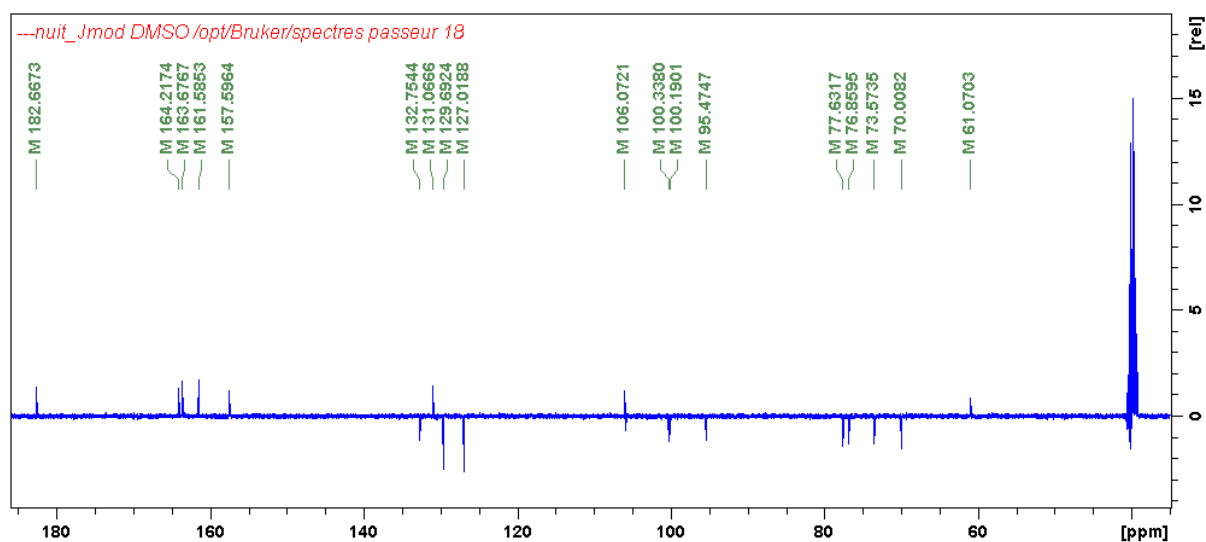

**Figure S8:**  $^{13}\text{C}$ -Jmod - NMR spectrum of compound **3** in DMSO, 25°C at 100.13 MHz

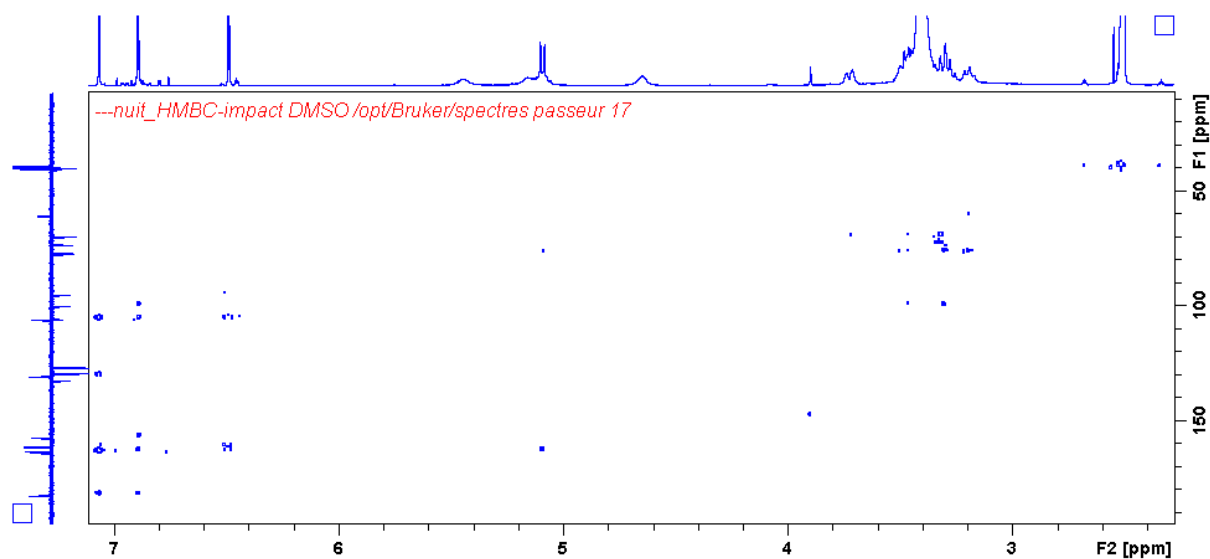

**Figure S9:**  $^1\text{H}$ - $^{13}\text{C}$  HMBC spectrum of compound **3** in DMSO, 25°C at 400.13 MHz for  $^1\text{H}$

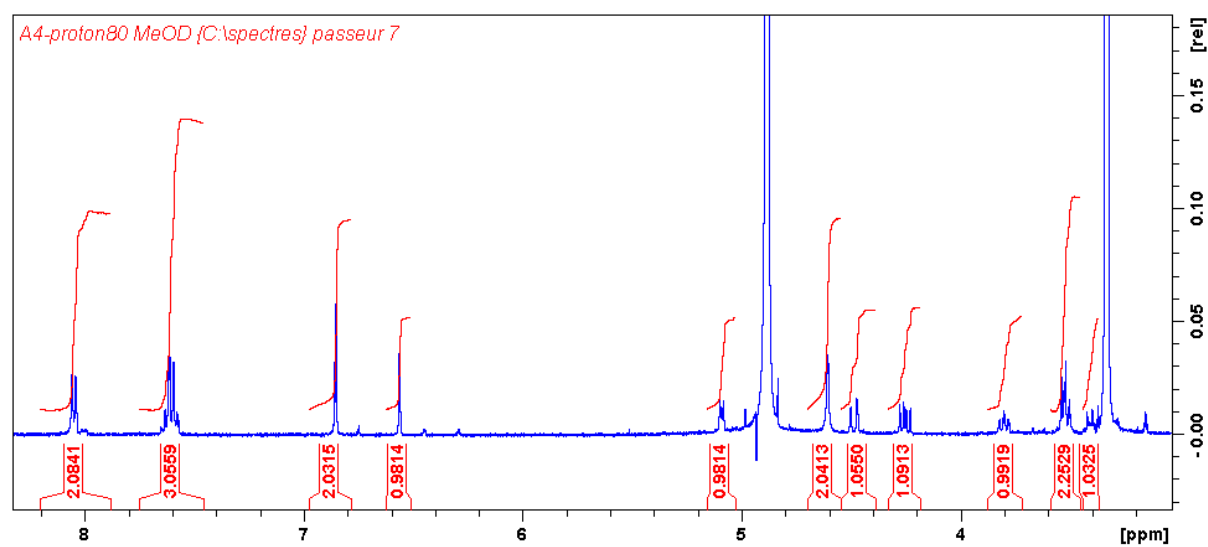

**Figure S10:**  $^1\text{H}$ -NMR spectrum of compound **4** in  $\text{CD}_3\text{OD}$ , 25°C at 400.13 MHz

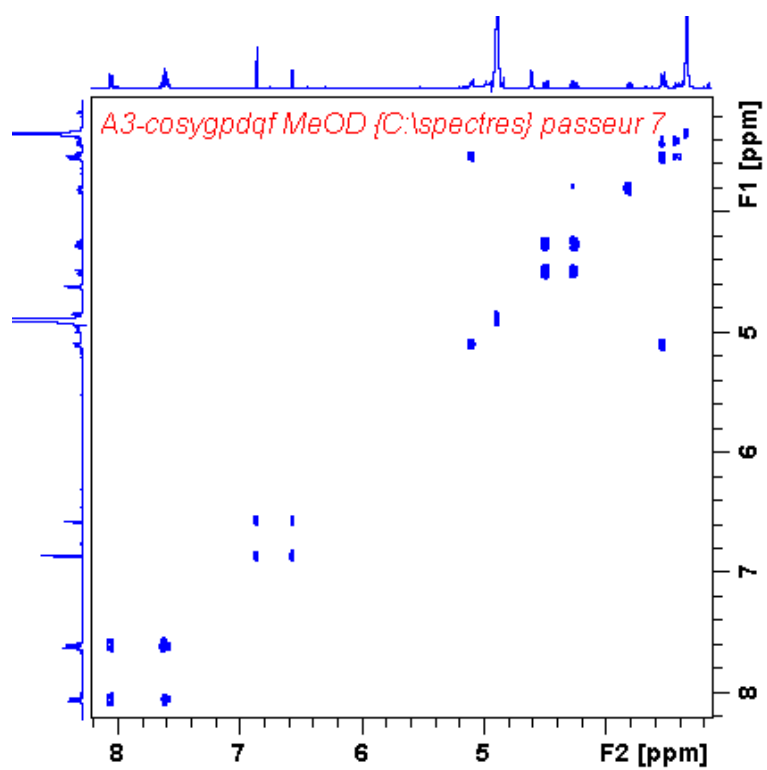

**Figure S11:**  $^1\text{H}$ - $^1\text{H}$  COSY spectrum of compound **4** in  $\text{CD}_3\text{OD}$ ,  $25^\circ\text{C}$  at 400.13 MHz

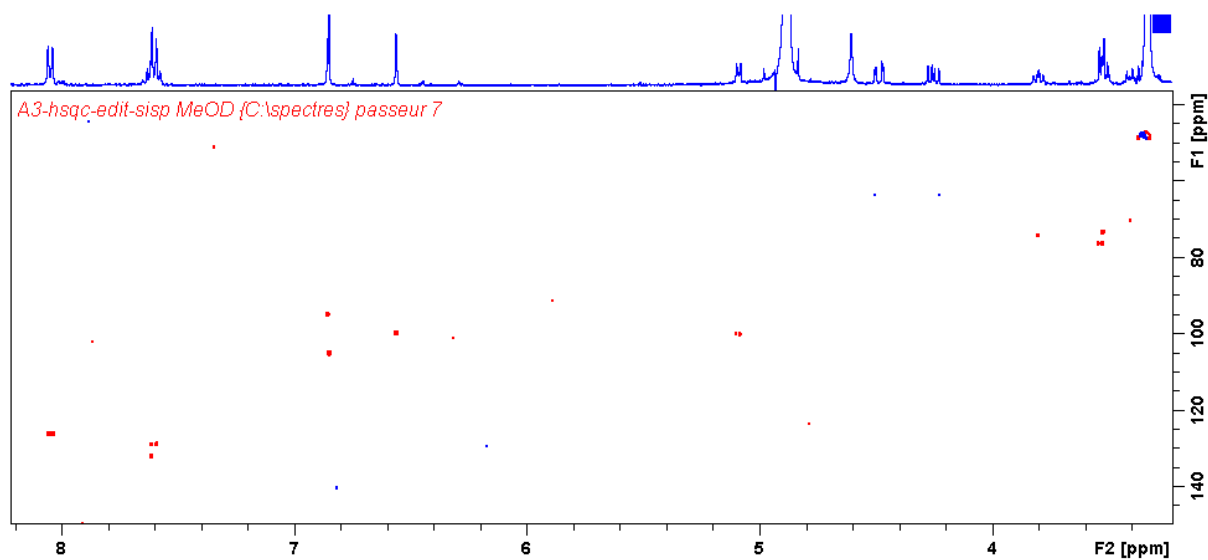

**Figure S12:**  $^1\text{H}$ - $^{13}\text{C}$  HSQC spectrum of compound **4** in  $\text{CD}_3\text{OD}$ ,  $25^\circ\text{C}$  at 400.13 MHz for  $^1\text{H}$

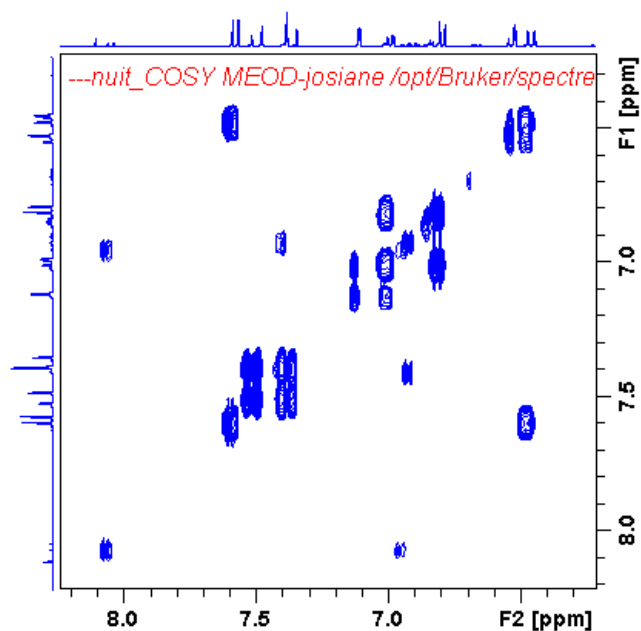

**Figure S13:**  $^1\text{H}$ - $^1\text{H}$  COSY spectrum of compound **5** in  $\text{CD}_3\text{OD}$ ,  $25^\circ\text{C}$  at 400.13 MHz

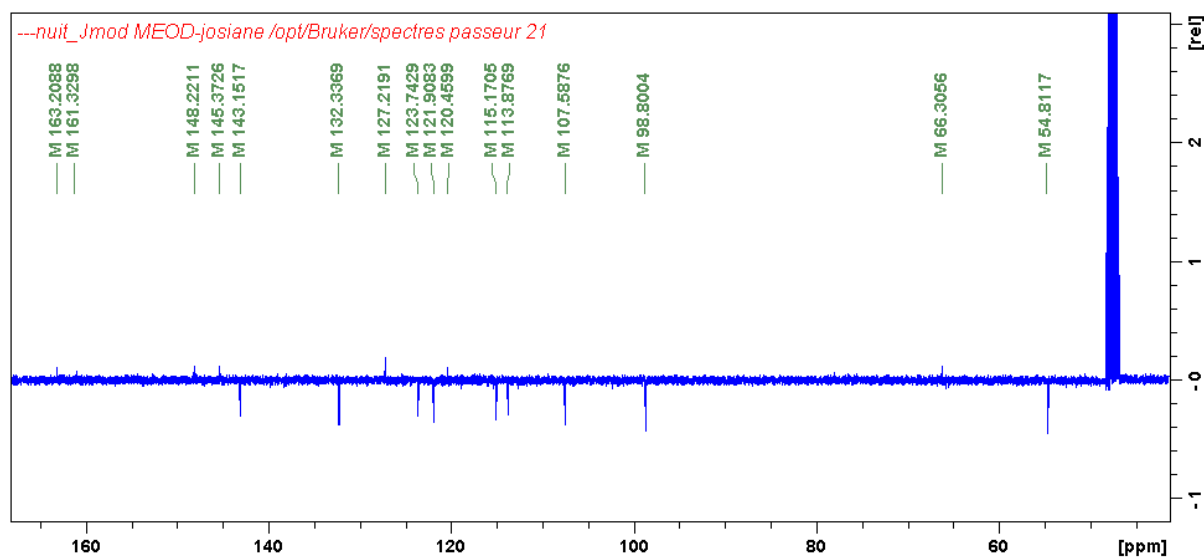

**Figure S14:**  $^{13}\text{C}$ -Jmod - NMR spectrum of compound **5** in  $\text{CD}_3\text{OD}$ ,  $25^\circ\text{C}$  at 100.13 MHz

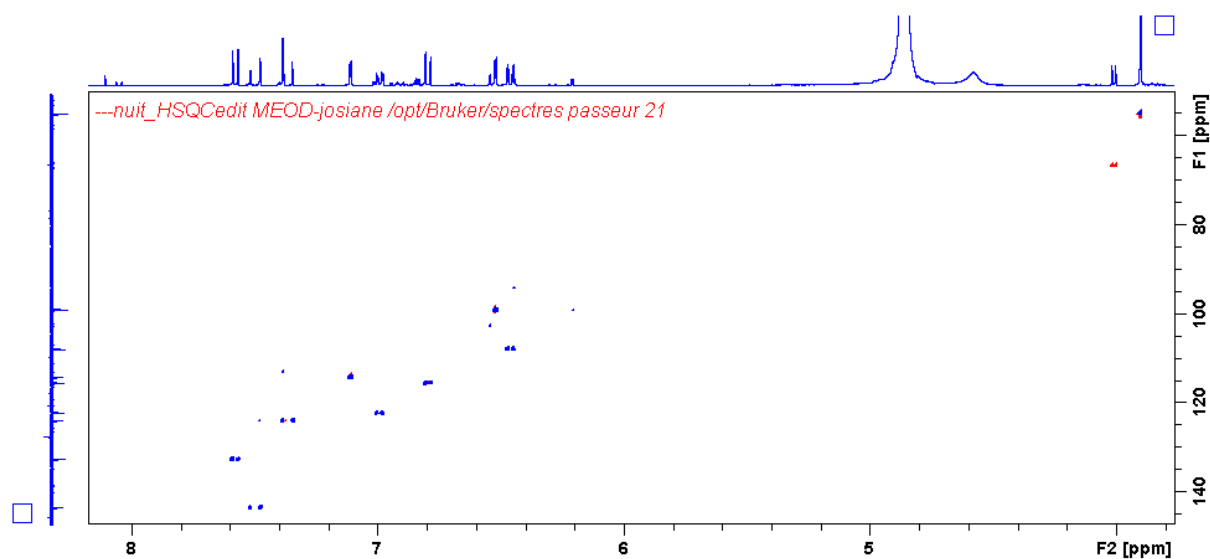

**Figure S15:**  $^1\text{H}$ - $^{13}\text{C}$  HSQC spectrum of compound 5 in  $\text{CD}_3\text{OD}$ ,  $25^\circ\text{C}$  at  $400.13\text{ MHz}$  for  $^1\text{H}$

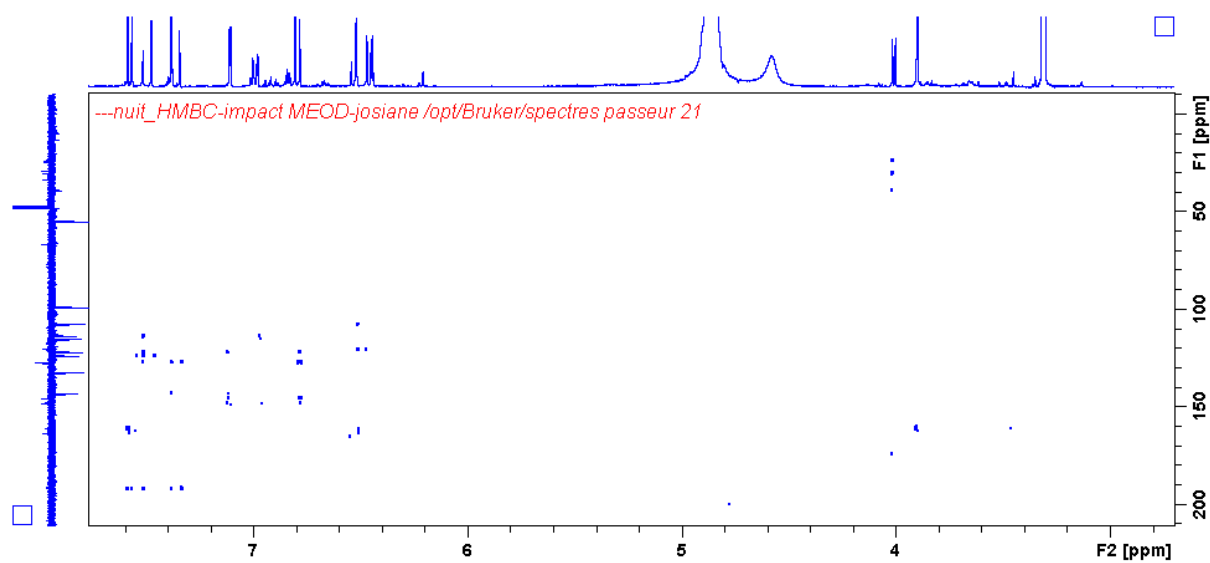

**Figure S16:**  $^1\text{H}$ - $^{13}\text{C}$  HMBC spectrum of compound 5 in  $\text{CD}_3\text{OD}$ ,  $25^\circ\text{C}$  at  $400.13\text{ MHz}$  for  $^1\text{H}$
